# **Title**

Generation of human bronchial organoids for SARS-CoV-2 research

## **Authors/Affiliations**

Tatsuya Suzuki<sup>1</sup>

Yumi Itoh<sup>1</sup>

Yusuke Sakai<sup>2</sup>

Akatsuki Saito<sup>3</sup>

Daisuke Okuzaki<sup>4,5,6</sup>

Daisuke Motooka<sup>7</sup>

Shohei Minami<sup>8</sup>

Takeshi Kobayashi<sup>8</sup>

Takuya Yamamoto<sup>9,10,11,12</sup>

Toru Okamoto<sup>1\*</sup>

Kazuo Takayama<sup>12\*</sup>

<sup>1</sup> Institute for Advanced Co-Creation Studies, Research Institute for Microbial Diseases, Osaka University, Suita 565-0871, Japan

<sup>2</sup> Laboratory of Veterinary Pathology, Joint Faculty of Veterinary Medicine, Yamaguchi University, Yamaguchi 753-8511, Japan

<sup>3</sup> Department of Veterinary Science, Faculty of Agriculture, University of Miyazaki, Miyazaki 889-2192, Japan

<sup>4</sup> Genome Information Research Center, Research Institute for Microbial Diseases, Osaka University, Suita 565-0871, Japan

25 <sup>5</sup> Single Cell Genomics, Human Immunology, WPI Immunology Frontier Research  
26 Center, Osaka University, Suita 565-0871, Japan  
27 <sup>6</sup> Institute for Open and Transdisciplinary Research Initiatives, Osaka University, Suita  
28 565-0871, Japan  
29 <sup>7</sup> Genome Information Research Center, Research Institute for Microbial Diseases,  
30 Osaka University, Suita 565-0871, Japan  
31 <sup>8</sup> Laboratory of Viral Replication, International Research Center for Infectious Diseases,  
32 Research Institute for Microbial Diseases, Osaka University, Suita, Osaka, 565-0871  
33 Japan  
34 <sup>9</sup> Institute for the Advanced Study of Human Biology (WPI-ASHBi), Kyoto University,  
35 Kyoto 606-8501 Japan  
36 <sup>10</sup> Medical-risk Avoidance based on iPS Cells Team, RIKEN Center for Advanced  
37 Intelligence Project (AIP), Kyoto 606-8507, Japan  
38 <sup>11</sup> AMED-CREST, Japan Agency for Medical Research and Development (AMED),  
39 Tokyo 100-0004, Japan  
40 <sup>12</sup> Center for iPS Cell Research and Application (CiRA), Kyoto University, Kyoto  
41 606-8507, Japan  
42  
43 **\*Corresponding author**  
44 Dr. Kazuo Takayama  
45 Center for iPS Cell Research and Application, Kyoto University, Shogoin Kawaharacho  
46 53, Sakyo-ku, Kyoto 606-8397, Japan  
47 Phone: +81-75-366-7362, FAX: +81-75-366-7074  
48 E-mail: [kazuo.takayama@cira.kyoto-u.ac.jp](mailto:kazuo.takayama@cira.kyoto-u.ac.jp)

49

50 Dr. Toru Okamoto

51 Institute for Advanced Co-Creation Studies, Research Institute for Microbial Diseases,

52 Osaka University, Yamadaoka 3-1, Suita 565-0871, Japan

53 Phone: +81-6-6879-8330, FAX: +81-6-6879-8330

54 E-mail: [toru@biken.osaka-u.ac.jp](mailto:toru@biken.osaka-u.ac.jp)

55

## 56 Abbreviations

57 2D two-dimensional

58 ACE2 angiotensin-converting enzyme 2

59 CC10 club cell protein 10

60 FGF fibroblast growth factor

61 hBEpC human bronchial epithelial cells

62 hBO human bronchial organoids

63 IFN-I type I interferon

64 IHC immunohistochemistry

65 KRT5 keratin 5

66 LDH lactate dehydrogenase

67 PSC pluripotent stem cell

68 RdRp RNA-dependent RNA polymerase

69 RNA seq RNA sequencing

70 SARS-CoV-2 severe acute respiratory syndrome coronavirus 2

71 TMPRSS2 transmembrane serine proteinase 2

72 WHO World Health Organization

73

## 74 **Abstract**

75       Coronavirus disease 2019 (COVID-19) is a disease that causes fatal disorders  
76 including severe pneumonia. To develop a therapeutic drug for COVID-19, a model that  
77 can reproduce the viral life cycle and evaluate the drug efficacy of anti-viral drugs is  
78 essential. In this study, we established a method to generate human bronchial organoids  
79 (hBO) from commercially available cryopreserved human bronchial epithelial cells and  
80 examined whether they could be used as a model for severe acute respiratory syndrome  
81 coronavirus 2 (SARS-CoV-2) research. Our hBO contain basal, club, ciliated, and  
82 goblet cells. Angiotensin-converting enzyme 2 (ACE2), which is a receptor for  
83 SARS-CoV-2, and transmembrane serine proteinase 2 (TMPRSS2), which is an  
84 essential serine protease for priming spike (S) protein of SARS-CoV-2, were highly  
85 expressed. After SARS-CoV-2 infection, not only the intracellular viral genome, but  
86 also progeny virus, cytotoxicity, pyknotic cells, and moderate increases of the type I  
87 interferon signal could be observed. Treatment with camostat, an inhibitor of TMPRSS2,  
88 reduced the viral copy number to 2% of the control group. Furthermore, the gene  
89 expression profile in SARS-CoV-2-infected hBO was obtained by performing RNA-seq  
90 analysis. In conclusion, we succeeded in generating hBO that can be used for  
91 SARS-CoV-2 research and COVID-19 drug discovery.

92

93

94     **Graphical abstract**

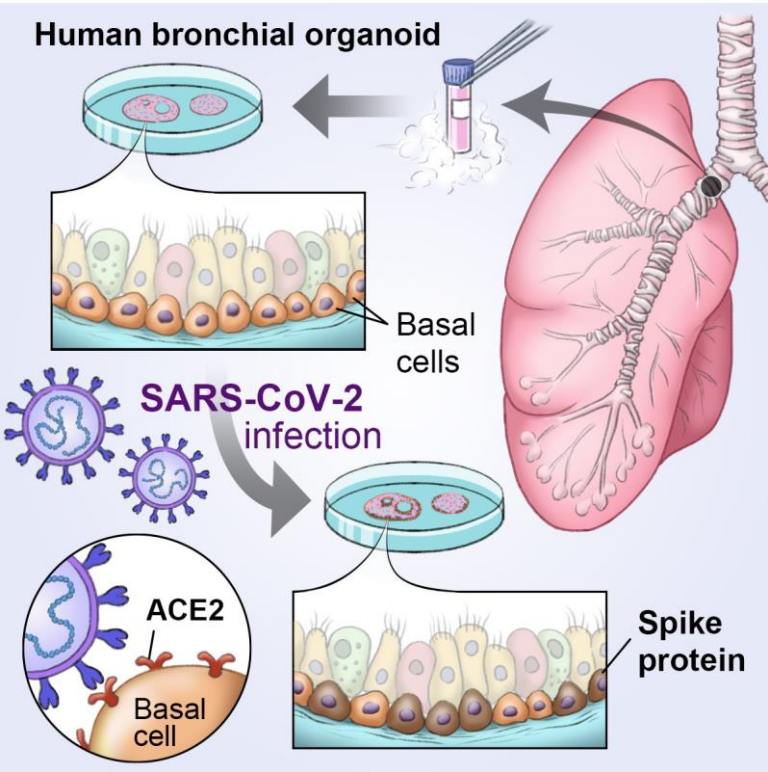

95  
96  
97     **Key words**

98     SARS-CoV-2, bronchial organoids, COVID-19, camostat

99

## Introduction

The “2019-new coronavirus disease (COVID-19) was first reported in China in December 2019<sup>1</sup> and declared a pandemic by the WHO in March 2020<sup>2</sup>. Severe pneumonia is most frequently observed in COVID-19 patients, and the number of COVID-19 patients and deaths are still increasing. These conditions have made it difficult for research on severe acute respiratory syndrome coronavirus 2 (SARS-CoV-2), which is the causative virus of COVID-19, to keep pace. SARS-CoV-2 is composed of four proteins: S (spike), E (envelope), M (membrane), and N (nucleocapsid) proteins. It is known that angiotensin-converting enzyme 2 (ACE2) is a SARS-CoV-2 receptor, and transmembrane serine proteinase 2 (TMPRSS2) is essential for priming S protein<sup>3</sup>. Thus, to accelerate SARS-CoV-2 research, a novel lung model that reproduces the viral life cycle with intact expression of these host factors is indispensable.

A number of animal and cell models that can be used for SARS-CoV-2 research have been reported (Takayama et al., in revision), but an *in vitro* lung model that can evaluate candidate therapeutic agents for COVID-19 is essential for conducting large-scale drug screening. Human lung organoids are excellent tools that can faithfully mimic the lung functions of living organisms<sup>4</sup>. The lungs consist of bronchi and alveoli. Lukassen et al. have performed single-cell analysis of alveoli and bronchi and reported that ACE2 is predominantly expressed in the transient secretory cell type, which displays a transient cell state between goblet and ciliated cells, in bronchi, but TMPRSS2 is strongly expressed in both lung tissues<sup>5</sup>. Therefore, a bronchial organoid containing transient secretory, goblet, and ciliated cells could be a useful model for

SARS-CoV-2 research.

Several reports have verified the usefulness of two-dimensional (2D) culturing airway epithelial cells in SARS-CoV2 studies. For example, SARS-CoV-2 infection experiments using human bronchial epithelial cells (hBEpC) showed cytopathic effects 96 hr after the infection on the layers of human airway epithelial cells <sup>6</sup>. In addition, hBEpC cultured using an air-liquid interface culture system can be used to evaluate viral infection, replication, and the drug efficacy of remdesivir <sup>7</sup>. 2D culture systems of hBEpC are relatively easy to use, but they cannot reproduce the cellular microenvironment in the living body and are difficult to use for long-time culture. Recently, it was shown that SARS-CoV-2 can infect and replicate in human pluripotent stem cell (PSC)-derived lung organoids containing bronchial epithelial cells and alveolar epithelial cells <sup>8</sup>. However, these organoids exhibit a fetal phenotype rather than an adult type <sup>9,10</sup>. Adult-type bronchial organoids are essential because of the severe infection caused by COVID-19 in adults. Human bronchial organoids (hBO) with adult phenotype can be established from intact human lung tissue <sup>11</sup>. However, it is difficult for many researchers to obtain an intact lung biopsy sample, because the process requires the approval of an ethics committee and informed consent from the donor. Therefore, in this study, we developed a method for generating hBO from commercially available cryopreserved adult hBEpC and applied it to SARS-CoV-2 research.

## Results

### Generation of human bronchial organoids from cryopreserved adult bronchial epithelial cells

We searched for the conditions that could establish hBO from cryopreserved adult

hBEpC. We found that after embedding the hBEpC in Matrigel and culturing with advanced DMEM/F12 medium containing FGF2, FGF7, FGF10, Noggin, R-spondin 1, Y-27632, and SB202190 (expansion medium), hBO could be established (**Table S1**). Furthermore, we could mature the hBO by culturing them with advanced DMEM/F12 medium containing FGF2, FGF7, FGF10, Y-27632, and A83-01 (differentiation medium) (**Table S1**). Among the growth factors included in the differentiation medium, FGF2 is important for enhancing the expression levels of *ACE2* and *TMPRSS2* (**Fig. S1**). Approximately 100 hBO were present in 50  $\mu$ L of Matrigel, and the diameter of each hBO was around 100-200  $\mu$ m (**Fig. 1A**). Transmission electron microscopy (TEM) images showed the presence of cilia and goblet cells (**Fig. 1B, Fig. S2**). The *ACE2* and *TMPRSS2* expression levels in hBO were higher than in cryopreserved adult hBEpC (**Fig. 1C**). Immunohistochemical analysis showed that ACE2 was expressed in part of the outer edge of hBO, while TMPRSS2 was expressed in part of the outer edge and lumen (**Fig. 1D, Fig. S3**). Because bronchi are composed of basal, ciliated, goblet, and club cells, a gene expression analysis of markers specific to these four cell types was performed. The gene expression levels of basal, ciliated, goblet, and club cell markers in hBO were higher than in cryopreserved adult hBEpC (**Figs. 1E-1H**). Consistently, hBO were also positive for  $\alpha$ -tubulin, CC10, mucin 5AC, and KRT5 (**Fig. 1I**). The outer edge and lumen of hBO was positive for KRT5 and acetylated  $\alpha$ -tubulin, respectively. These results suggest that basal cells are positive for both ACE2 and TMPRSS2, but ciliated cells are positive only for TMPRSS2. Based on these observations, we succeeded in generating expandable and functional hBO from cryopreserved adult hBEpC.

## RNA-seq analysis of human bronchial organoids



RNA-seq analysis was performed to further characterize hBO. A heat map, principal component analysis (PCA), and scatter plot of gene expression profiles all show hBO is closer to hBEpC than to A549 cells (**Figs. 2A-2C**). A second heat map of bronchial epithelial markers showed that hBO expressed bronchial epithelial markers more strongly than did hBEpC or A549 cells (**Fig. 2D**). These results suggest that hBO have higher bronchial functions than A549 cells or hBEpC.

### **SARS-CoV-2 infection experiments using human bronchial organoids**

Next, we investigated whether hBO can be applied to SARS-CoV-2 research. HBO were infected with SARS-CoV-2 and then cultured in differentiation medium for 5 days (**Fig. 3A**). We observed a significant accumulation of LDH in the culture medium of infected hBO (**Fig. 3B**), suggesting that cytotoxicity was caused by the infection. At day 5 after the infection, viral gene expression in infected hBO was clearly detected (**Fig. 3C**). IHC analysis showed that S protein-positive cells were observed in part of the outer edge of hBO (**Fig. 3D**). In addition, S protein co-localized with KRT5 (**Fig. 3E**), but not with CC10 (**Fig. S4**), suggesting that SARS-CoV-2 infected and replicated in basal cells. Overall, these results indicate that SARS-CoV-2 can infect and replicate in hBO.

Currently, clinical trials using camostat, favipiravir, nafamostat, chloroquine, ritonavir/lopinavir, and remdesivir are underway around the world to develop therapeutic agents for COVID-19. However, the evaluation of these drugs using *in vitro* lung models is rare. Therefore, in this study, the effect of camostat, an inhibitor of TMPRSS2, was examined using our hBO because camostat was demonstrated as a promising candidate in cell culture models<sup>3</sup>. Upon camostat treatment, the amount of

SARS-CoV-2 viral genome was reduced to 2% of untreated infected hBO (**Fig. 3C**). In addition, LDH release from infected hBO was significantly reduced after camostat treatment (**Fig. 3B**). Finally, we examined the culture supernatants of infected hBO. We found that infectious virus was significantly observed in infected hBO, but the production of infectious virus was impaired by treatment with camostat (**Fig. 3F**). Collectively, our data indicated that hBO can secrete infectious virus into the culture medium, suggesting that our hBO system can investigate the entire life cycle of SARS-CoV-2.

Next, we examined the pathological effects of the SARS-CoV-2 infection. We observed that the number of pyknotic cells seemed to increase with the infection (**Fig. 3G**). In addition, the expression levels of type I IFN (IFN-I) and IFN-stimulated genes were moderately increased after SARS-CoV-2 infection (**Fig. S5A**). Furthermore, SARS-CoV-2 infection did not change the gene expression levels of *ACE2* or *TMPRSS2* (**Fig. S5B**). From the above, these results suggest that hBO can be used to reproduce SARS-CoV-2-induced pulmonary disorder and to evaluate the effect of therapeutic agents.

### **RNA-seq analysis of SARS-CoV-2-infected human bronchial organoids**

RNA-seq analysis was performed to investigate the effects of SARS-CoV-2 infection and camostat treatment in detail. A heat map shows that the gene expression profile of SARS-CoV-2-infected hBO is closer to SARS-CoV-2-infected hBO treated with camostat than uninfected hBO (**Fig. 4A**). A PCA and scatter plot of the gene expressions agree with this finding (**Figs. 4B, C**). Additionally, SARS-CoV-2 infection increased the expression levels of IFN-I signaling-related genes in hBO (**Fig. 4D**).

PGSEA applied on GO biological process gene sets shows that the expression levels of genes involved in positive regulation of immune effector process, regulation of inflammatory response, interferon-gamma production, and positive regulation of acute inflammatory response were increased by SARS-CoV-2 infection and that this increase was suppressed by camostat treatment (**Fig. 4E**). These results indicated that SARS-CoV-2 infection induces IFN-I signaling-related genes and that camostat treatment reversed this phenotype.

## Discussion

In this study, we succeeded in generating hBO from cryopreserved adult hBEpC and applied it to SARS-CoV-2 research. We confirmed that SARS-CoV-2 could infect and replicate in these cells and that camostat could suppress the replication. If small airway organoids and alveolar organoids can be produced from cryopreserved adult human small airway epithelial cells and alveolar epithelial cells, respectively, the infection and replication of SARS-CoV-2 in each part of the lung can be evaluated. Recently, it was shown that SARS-CoV-2 infection and replication can be observed in kidney<sup>12</sup>, liver ductal<sup>13</sup>, and gut organoids<sup>14</sup>. By comparing the infection and replication ability of SARS-CoV-2 in these organoids, the sensitivity of SARS-CoV-2 in each organ could be compared.

The incorporation of mechanical stress into our organoid system could improve the accuracy of SARS-CoV-2 research. The human airway is always exposed to shear stress due to air flow. It has been reported that a functional *in vitro* lung model can be generated using a device capable of medium perfusion and expansion/contraction (organ-on-a-chip)<sup>15</sup>. Recently, it was reported that the infection and replication of

SARS-CoV-2 can be observed by culturing A549 cells, which are lung cancer cells, on a chip device<sup>16</sup>. By applying our hBO to a similar device, we may be able to construct an *in vitro* bronchi model that more closely mimics the living body.

Nevertheless, even in its current condition, we used our hBO to evaluate the efficacy of a COVID-19 therapeutic agent and observe the cytotoxicity and innate immune responses caused by the SARS-CoV-2. Moreover, we could clarify the localization of SARS-CoV-2 in the hBO. These results could be obtained because hBO reproduce the cell populations and functions of the bronchi. Our data of RNA-seq analysis would give us a change to understand the virus affects cellular and bronchial functions.

Finally, we showed that camostat has a positive effect against COVID-19 infection in hBO, demonstrating its usefulness for COVID-19 drug discovery. Similar studies on experimental COVID-19 drugs including those currently undergoing clinical trials should be considered. Furthermore, because hBO can be generated from commercially available cryopreserved hBEpC quickly (10 days) and at large scale, we expect hBO will shorten the search for effective COVID-19 agents.

## Acknowledgements

The SARS-CoV-2 strain used in this study (SARS-CoV-2/Hu/DP/Kng/19-020) was obtained from Kanagawa Prefectural Institute of Public Health. This research was supported by the iPS Cell Research Fund. The figure 3A was created using Biorender (<https://biorender.com>). We thank Dr. Tomohiko Takasaki and Dr. Jun-Ichi Sakuragi (Kanagawa Prefectural Institute of Public Health) for providing SARS-CoV-2 strain (SARS-CoV-2/Hu/DP/Kng/19-020), Dr. Misaki Ouchida (Kyoto University) for creating graphical abstract, Dr. Peter Karagiannis (Kyoto University) for critical reading of the manuscript, Dr. Nobihito Morone (University of Cambridge) for critical discussions, and Ms. Kazusa Okita and Ms. Eri Kawaguchi for technical assistance with the RNA-seq experiments.

## Author Contributions

TS performed the SARS-CoV-2 experiments and analyses  
 YI performed the SARS-CoV-2 experiments and analyses  
 YS performed the immunohistochemical analysis  
 AS prepared the materials for the SARS-CoV-2 experiments and analyses  
 DO performed the analysis of RNA-seq data of the infected bronchial organoids  
 DM collected RNA-seq data of the infected bronchial organoids  
 SM performed the SARS-CoV-2 experiments and analyses  
 TK performed the SARS-CoV-2 experiments and analyses  
 TY collected the RNA-seq data of the bronchial organoids  
 TO designed the research and performed the SARS-CoV-2 experiments and analyses  
 KT designed the research, generated the bronchial organoids, performed statistical

analysis, and wrote the paper

## Declaration of interests

The authors declare no competing financial interests.

## References

- 1 Lu, H., Stratton, C. W. & Tang, Y. W. Outbreak of Pneumonia of Unknown Etiology in Wuhan China: the Mystery and the Miracle. *Journal of Medical Virology*.
- 2 Whitworth, J. COVID-19: a fast evolving pandemic. *Transactions of The Royal Society of Tropical Medicine and Hygiene* (2020).
- 3 Hoffmann, M. *et al.* SARS-CoV-2 cell entry depends on ACE2 and TMPRSS2 and is blocked by a clinically proven protease inhibitor. *Cell* (2020).
- 4 van der Vaart, J. & Clevers, H. Airway organoids as models of human disease. *Journal of Internal Medicine* (2020).
- 5 Lukassen, S. *et al.* SARS - CoV - 2 receptor ACE2 and TMPRSS2 are primarily expressed in bronchial transient secretory cells. *The EMBO journal* (2020).
- 6 Zhu, N. *et al.* A novel coronavirus from patients with pneumonia in China, 2019. *New England Journal of Medicine* (2020).
- 7 Pizzorno, A. *et al.* Characterization and treatment of SARS-CoV-2 in nasal and bronchial human airway epithelia. *bioRxiv* (2020).
- 8 Han, Y. *et al.* Identification of Candidate COVID-19 Therapeutics using hPSC-derived Lung Organoids. *bioRxiv* (2020).
- 9 Wong, A. P. *et al.* Directed differentiation of human pluripotent stem cells into

309 mature airway epithelia expressing functional CFTR protein. *Nature biotechnology*  
310 **30**, 876 (2012).

311 10 Firth, A. L. *et al.* Generation of multiciliated cells in functional airway epithelia  
312 from human induced pluripotent stem cells. *Proceedings of the National Academy of*  
313 *Sciences* **111**, E1723-E1730 (2014).

314 11 Sachs, N. *et al.* Long - term expanding human airway organoids for disease  
315 modeling. *The EMBO journal* **38** (2019).

316 12 Monteil, V. *et al.* Inhibition of SARS-CoV-2 infections in engineered human tissues  
317 using clinical-grade soluble human ACE2. *Cell* (2020).

318 13 Zhao, B. *et al.* Recapitulation of SARS-CoV-2 infection and cholangiocyte damage  
319 with human liver ductal organoids. *Protein & Cell*, 1-5 (2020).

320 14 Lamers, M. M. *et al.* SARS-CoV-2 productively infects human gut enterocytes.  
321 *Science* (2020).

322 15 Huh, D. *et al.* Reconstituting organ-level lung functions on a chip. *Science* **328**,  
323 1662-1668 (2010).

324 16 Si, L. *et al.* Human organs-on-chips as tools for repurposing approved drugs as  
325 potential influenza and COVID19 therapeutics in viral pandemics. *bioRxiv* (2020).  
326  
327

**Figure 1**

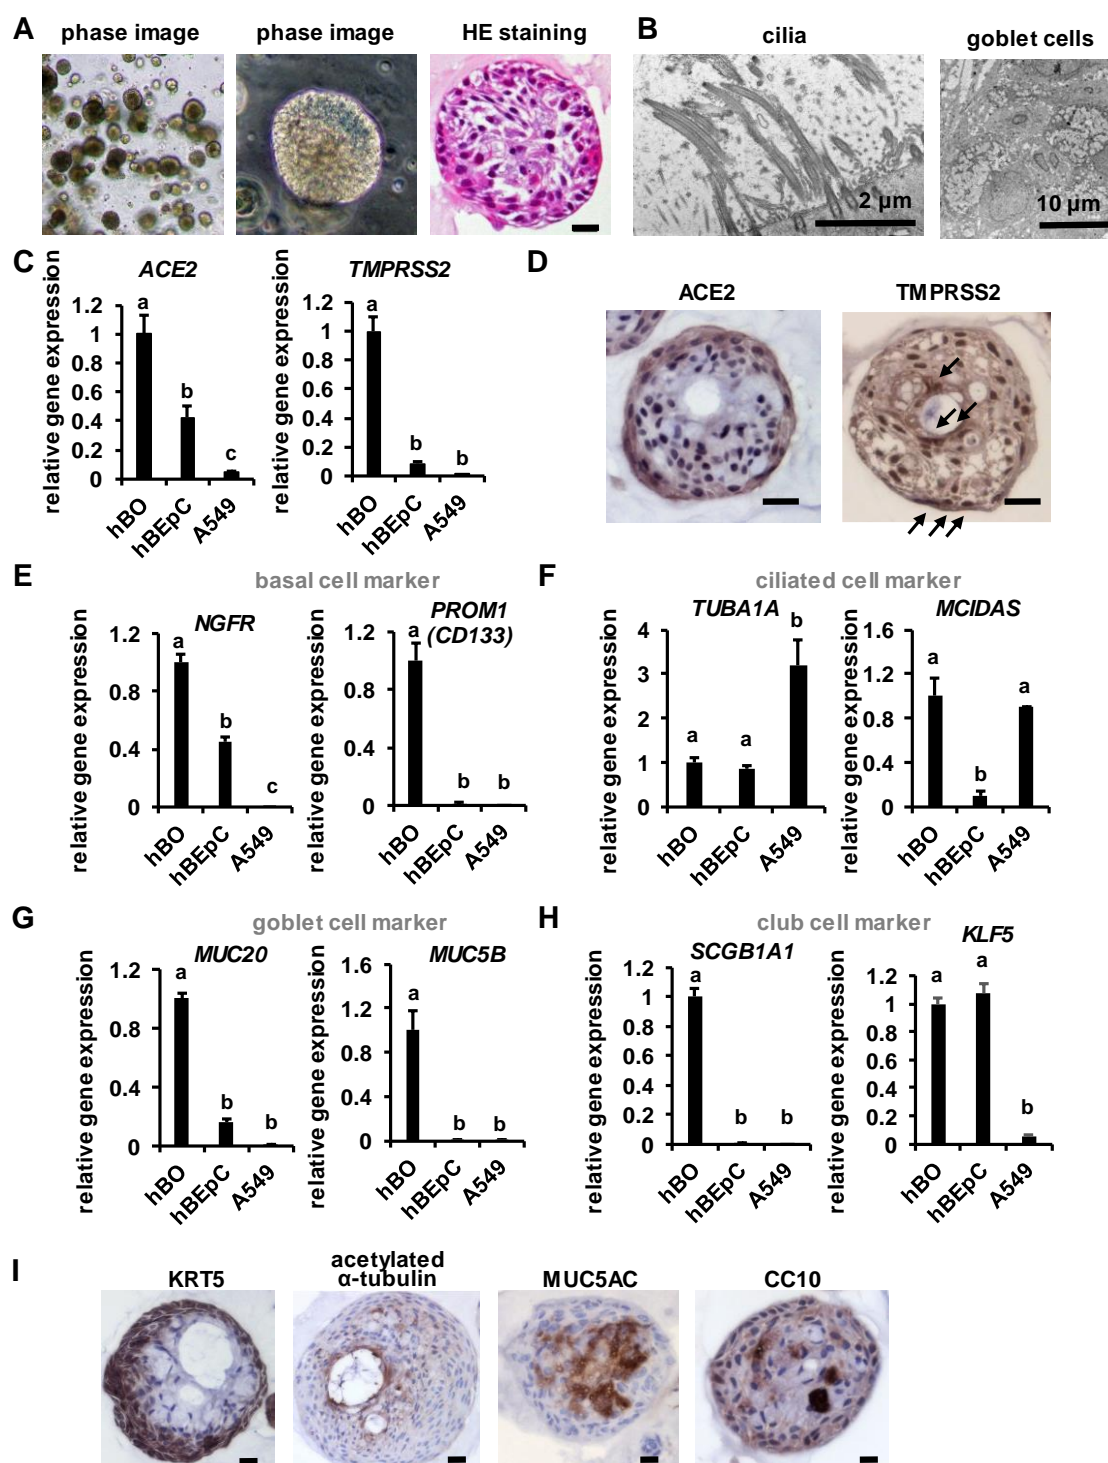

**Figure 1 Generation of human bronchial organoids**

(A) Phase and HE staining images of human bronchial organoids (hBO). Scale bar = 20

$\mu$ m. (B) A TEM image of hBO. Larger images are shown in Fig. S2. (C) The gene



expression levels of *ACE2* and *TMPRSS2* in hBO and hBEpC were examined by qPCR. The gene expression levels in hBO were normalized to 1.0. (D) The expressions of *ACE2* and *TMPRSS2* were examined by immunohistochemistry. Scale bar = 20  $\mu$ m. (E-H) The gene expression levels of basal (E), ciliated (F), goblet (G), and club (H) cell markers in hBO, hBEpC, and A549 cells were examined by qPCR. The gene expression levels in hBO were normalized to 1.0. (I) Immunohistochemistry analysis of KRT5 (basal cell marker), acetylated  $\alpha$ -tubulin (ciliated cell marker), Mucin 5AC (goblet cell marker), and CC10 (club cell marker) in hBO. Scale bars = 20  $\mu$ m. All data are represented as means  $\pm$  SD ( $n = 3$ ). Statistical significance was evaluated by one-way ANOVA followed by Tukey's post-hoc tests. Groups that do not share the same letter are significantly different from each other ( $p < 0.05$ ).

**Figure 2**

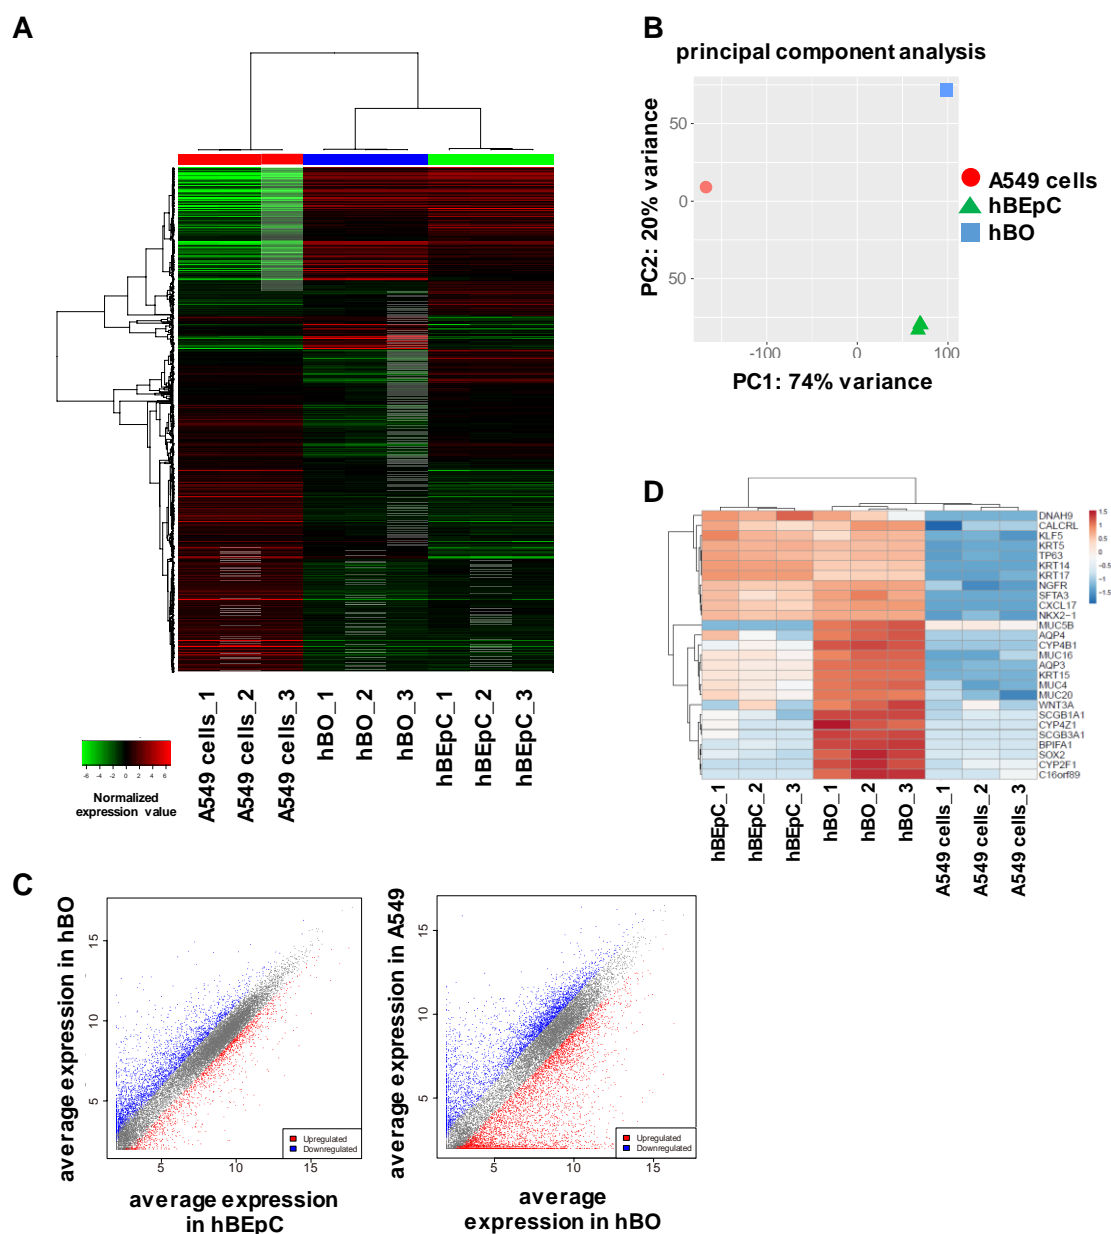

**Figure 2 Global gene expression profile of human bronchial organoids**

RNA seq analysis was performed in A549 cells (A549), human bronchial organoids (hBO), and human bronchial epithelial cells (hBEpC). (A) Hierarchical clustering analysis of 2,000 variable genes was performed. (B) Principal component analysis (PCA) in “A549”, “hBO”, and “hBEpC”. (C) A scatter plot in “A549”, “hBO”, and

350 “hBEpC”. (D) A clustering analysis of bronchial markers was performed.

351

**Figure 3**

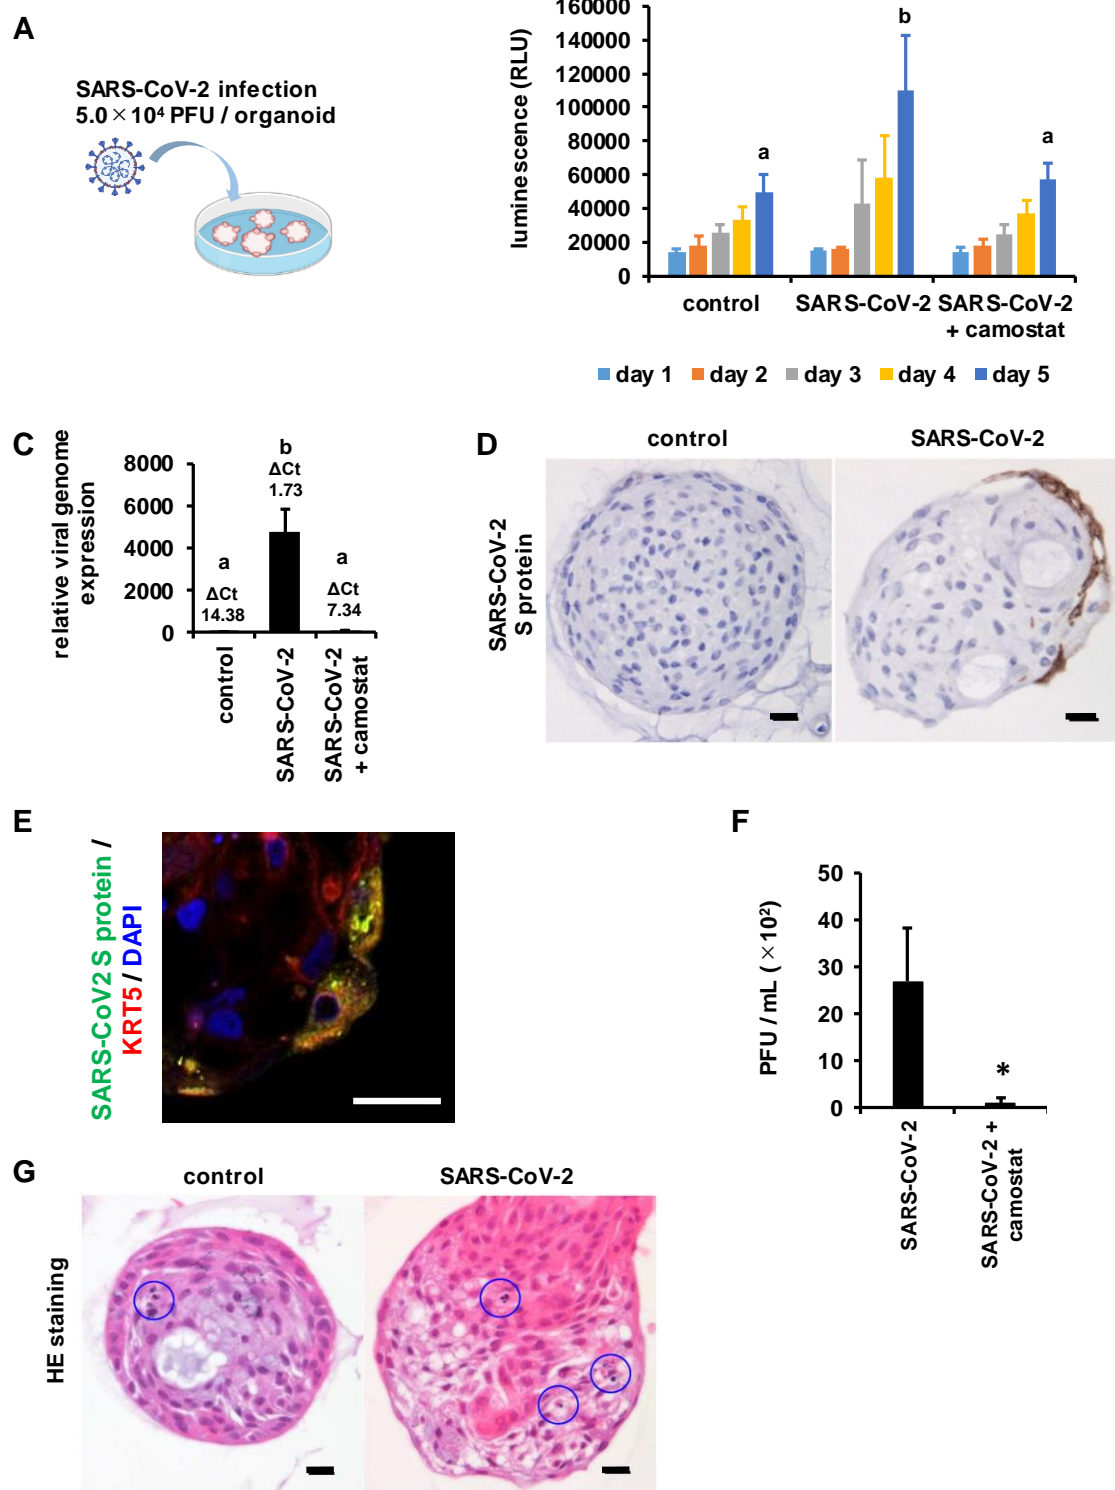

**Figure 3 SARS-CoV-2 infection experiments in human bronchial organoids**

(A) hBO were infected with SARS-CoV-2 ( $5.0 \times 10^4$  PFU/well) in the presence or

absence of 10  $\mu$ M camostat and then cultured with differentiation medium for 5 days.

(B) At days 1, 2, 3, 4, and 5 after the infection, an LDH assay was performed. (C) The viral genome expression levels in uninfected organoids (control), infected organoids (SARS-CoV-2), and infected organoids treated with camostat (SARS-CoV-2 + camostat) were examined by qPCR. The gene expression levels in control were normalized to 1.0. Statistical significance was evaluated by one-way ANOVA followed by Tukey's post-hoc tests. Groups that do not share the same letter are significantly different from each other ( $p < 0.05$ ). (D) The expression of SARS-CoV-2 Spike protein was examined by immunohistochemistry. Scale bar = 20  $\mu$ m. (E) The expression of SARS-CoV-2 Spike protein and KRT5 was confirmed by immunofluorescence staining. Nuclei were counterstained with DAPI. Scale bar = 20  $\mu$ m. (F) The amount of infectious virus in the supernatant was measured. Statistical analysis was performed using the unpaired two-tailed Student's  $t$ -test (\*  $p < 0.05$ ). (G) HE staining images of uninfected organoids (control) and infected organoids (SARS-CoV-2) are shown. Blue circles show the existence of pyknotic cells. Scale bar = 20  $\mu$ m. All data are represented as means  $\pm$  SD ( $n = 3$ ).

**Figure 4**

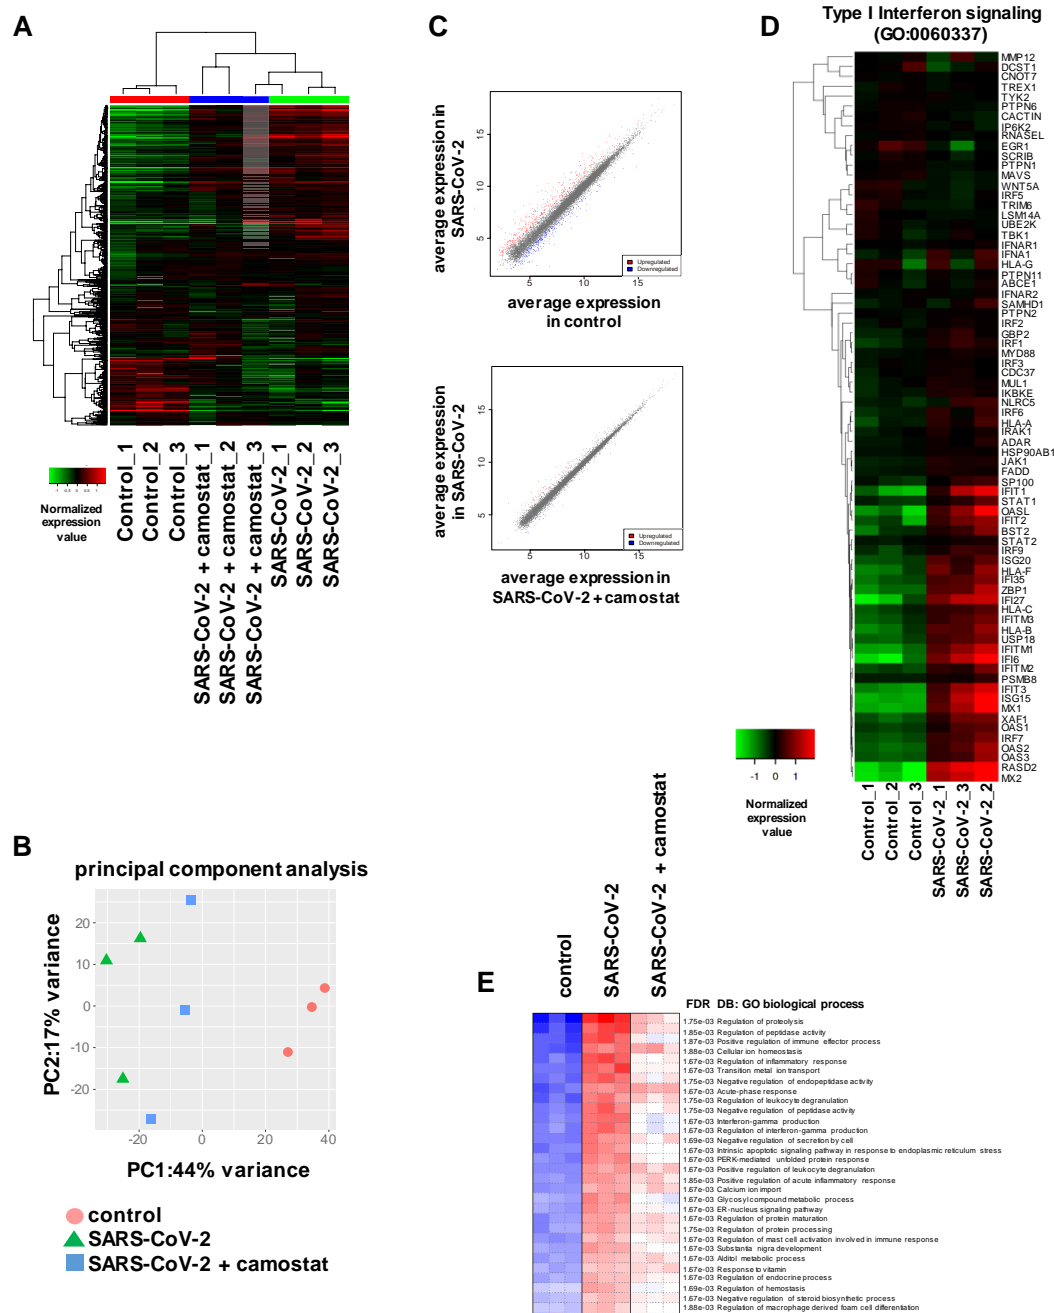

**Figure 4 Global gene expression profile of infected human bronchial organoids**

RNA seq analysis of uninfected hBO (control), SARS-CoV-2-infected hBO

(SARS-CoV-2), and SARS-CoV-2-infected hBO treated with camostat (SARS-CoV-2 +

camostat). (A) A clustering analysis of 2,000 variable genes was performed. (B)

377 Principal component analysis (PCA) in “control”, “SARS-CoV-2”, “SARS-CoV2 +  
378 camostat”. (C) A scatter plot in “control”, “SARS-CoV-2”, “SARS-CoV2 + camostat”.  
379 (D) A heat map of IFN-I signaling-related genes in “control” and “SARS-CoV-2” is  
380 shown. (E) PGSEA (Parametric Gene Set Enrichment Analysis) applied on GO  
381 biological process gene sets was performed.
